# Supplementary material
Source: publisher figshare collection journal article supplement (https://rs.figshare.com/ndownloader/files/17842652)
Supplement: Supplementary file 1 [file 17842652]

10	0.01	0.2	-1	1	0.03	0.04	0.4	0	5	1	56.812	0.11013
10	0.2	0.5	-1	1	0.03	0.04	0.4	0.1	5	1	56.324	0.09393
10	0.99	0.8	-1	1	0.03	0.04	0.4	0.2	5	1	222.39	0.09699
10	0.99	0.9	-1	1	0.03	0.04	0.4	0.3	5	1	429.07	0.10686
10	0.99	0.9	-1	1	0.03	0.04	0.4	0.4	5	1	432.44	0.11164
10	0.99	0.99	-1	1	0.03	0.04	0.4	0.5	5	1	2356.8	0.11697
10	0.99	0.99	-1	1	0.03	0.04	0.4	0.6	5	1	2375.8	0.11946
10	0.99	0.99	-1	1	0.03	0.04	0.4	0.7	5	1	2377.7	0.11771
10	0.99	0.99	-1	1	0.03	0.04	0.4	0.8	5	1	2380.5	0.11716
10	0.99	0.99	-1	1	0.03	0.04	0.4	0.9	5	1	2407.9	0.12026
